# Supplementary material for: Date Palm Seed Oil (Phoenix dactylifera L.) Green Extraction: Physicochemical Properties, Antioxidant Activities, and Phenolic and Fatty Acid Profiles
Source: Hindawi journal article supplement (doi:10.1155/2021/2394220), 2021-10-06
Supplement: f1 [file 2394220.f1.docx]

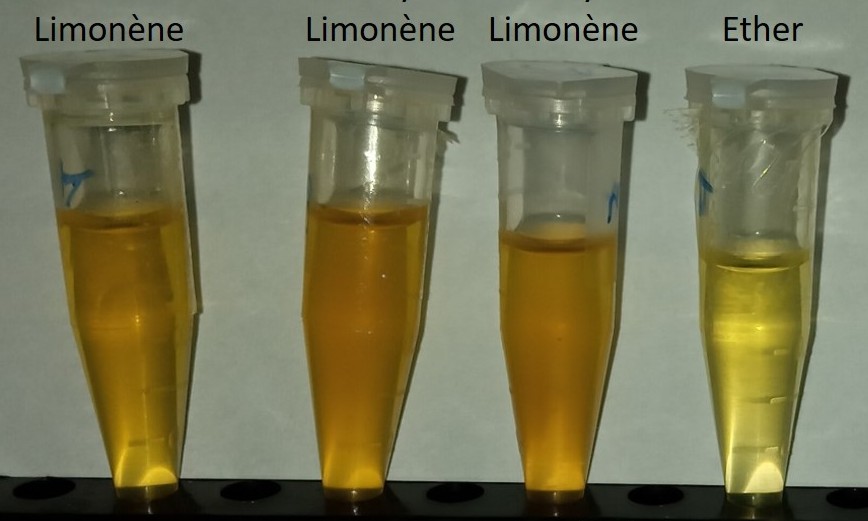

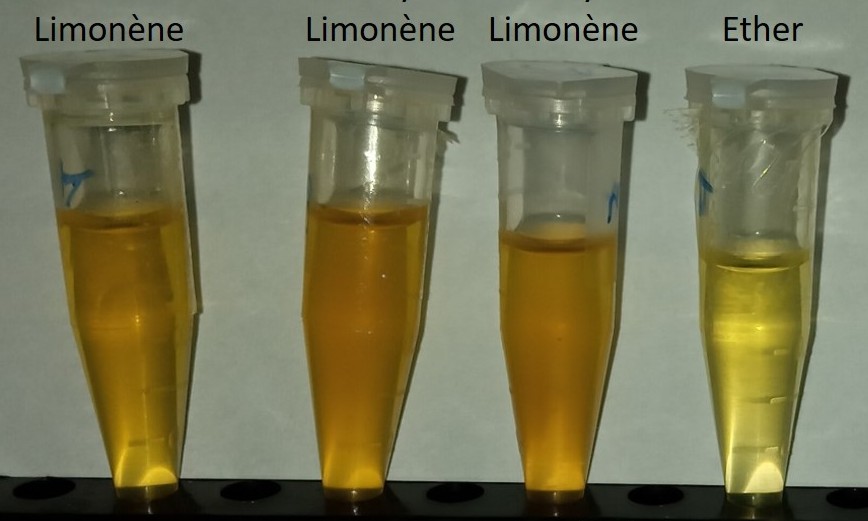

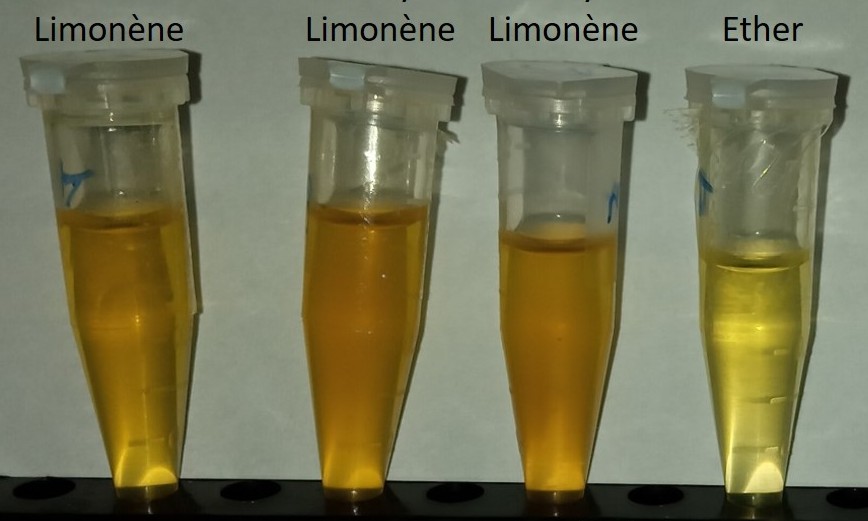


Essential oil /Soaking

Essential oil / Soxhlet

Petroleum Ether / Soxhlet

**Supplementary file 1.** Photos of the different extracted oils
